# Supplementary material
Source: Springer Nature journal article supplement (https://www.springermedizin.de/resource/supplementary/12957_2012_1020_MOESM6_ESM.pdf/9561622)

Proportion

## Disease Specific Survival

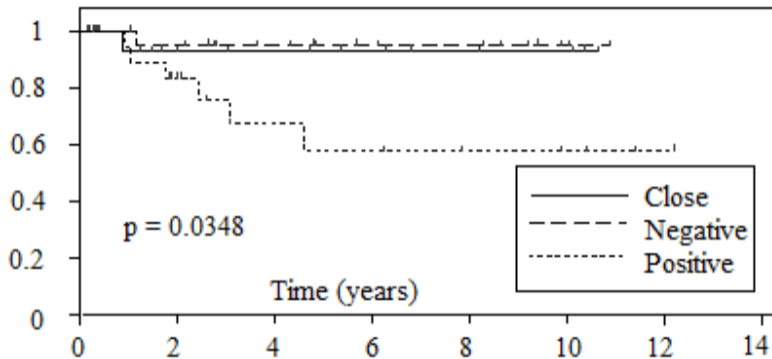

Numbers at Risk

|          |    |    |   |
|----------|----|----|---|
| Close    | 15 | 7  | 3 |
| Negative | 23 | 10 | 1 |
| Positive | 21 | 6  | 3 |

Supplement: MOESM6 [file 9561622]
